# Supplementary material for: Oxidative Stress-Induced circHBEGF Promotes Extracellular Matrix Production via Regulating miR-646/EGFR in Human Trabecular Meshwork Cells
Source: Hindawi journal article supplement (doi:10.1155/2020/4692034), 2020-11-24

**A**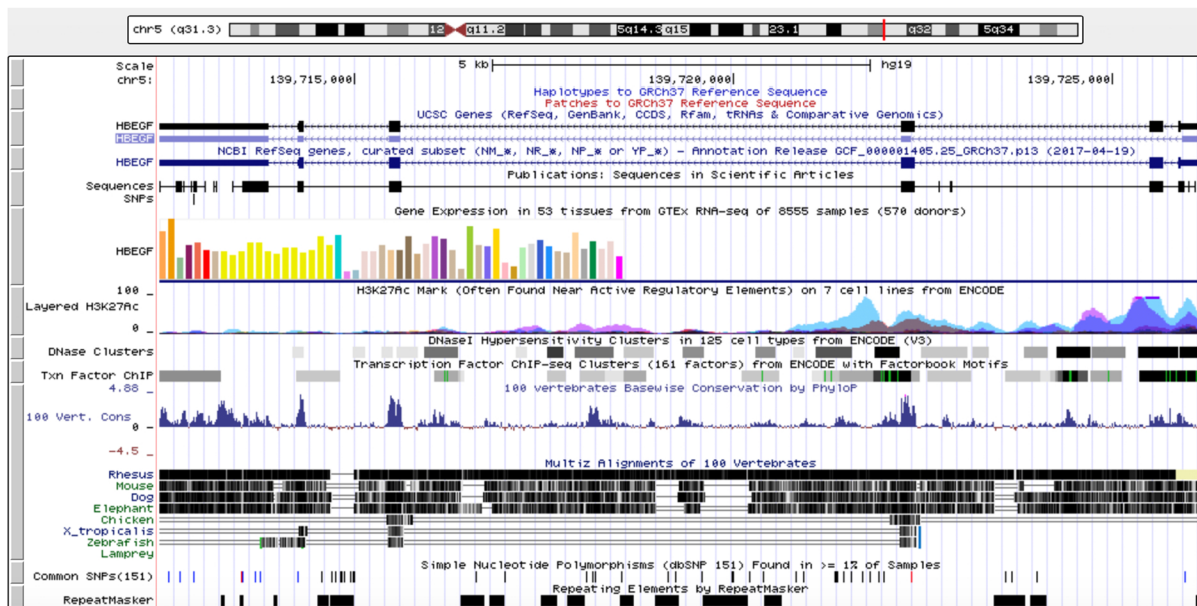**B**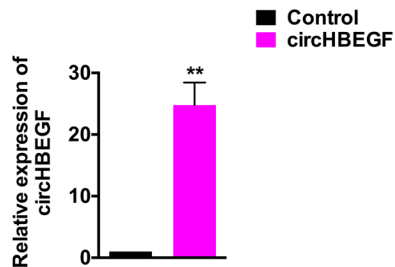**C**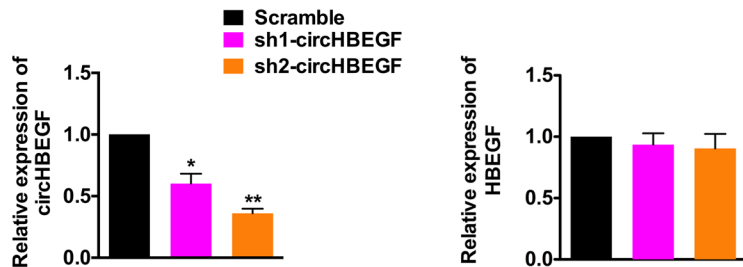

Supplement: f1 [file 4692034.f1.pdf]
