# Supplementary material for: Oxidative Stress-Induced circHBEGF Promotes Extracellular Matrix Production via Regulating miR-646/EGFR in Human Trabecular Meshwork Cells
Source: Hindawi journal article supplement (doi:10.1155/2020/4692034), 2020-11-24
Supplement: f3 [file 4692034.f3.pdf]

| Column A: Title ;       | Column B: Mean ;                                                                                                                                                                                                                                                                                      | Column C: Example ;                                                  |
|-------------------------|-------------------------------------------------------------------------------------------------------------------------------------------------------------------------------------------------------------------------------------------------------------------------------------------------------|----------------------------------------------------------------------|
| Title                   | Mean                                                                                                                                                                                                                                                                                                  | Example                                                              |
| Title                   | Mean                                                                                                                                                                                                                                                                                                  | Example                                                              |
| ProbeName               | Probe name                                                                                                                                                                                                                                                                                            | hsa_circ_0000026                                                     |
| ControlType             | quality control site (pos:Quality Control Point, FALSE: Non-Quality Control Point)                                                                                                                                                                                                                    | Pos/FALSE                                                            |
| Sample_NS               | Normalized signal values of probes in samples                                                                                                                                                                                                                                                         | 7.023509                                                             |
| Sample_flag             | Detection and determination of samples: A: There is no significant difference between the signal of the probe and background; P: There is significant difference between the signal of the probe and background; M: The difference between the signal of the probe and background is between A and P. | P/M/A                                                                |
| Fold_change(1_vs_2)     | ( formula : foldchange=average(power(2,signal(CASE)))/ average(power(2,signal(CONTROL)))) Multiple differences of two groups (Biologically repetitive samples) or two (No biologically duplicated samples)                                                                                            | 3.4                                                                  |
| foldchange (abs)        | Absolute value of multiple differences of two groups (Biologically repetitive samples) or two (No biologically duplicated samples)                                                                                                                                                                    | 3.4                                                                  |
| Regulation(1_vs_2)      | Up-down trend of two groups (Biologically repetitive samples) or two (No biologically duplicated samples)                                                                                                                                                                                             | up/down                                                              |
| Type                    | RNAtype: circRNA/lncRNA / mRNA                                                                                                                                                                                                                                                                        | circRNA/lncRNA/mRNA                                                  |
| ProbeSeq                | Probe sequence                                                                                                                                                                                                                                                                                        | AAGGTATCTTAAGGAAAGTTC<br>AAGGTAAAAAGACAGAGGTGT<br>TTATGGTTACATGTGTGT |
| circRNA_ID              | Gene ID in circbase database                                                                                                                                                                                                                                                                          | hsa_circ_0082053                                                     |
| chrom                   | circRNA derived chromosome                                                                                                                                                                                                                                                                            | Chr7                                                                 |
| Hsa_hg19_circRNA_start  | Sequence starting position                                                                                                                                                                                                                                                                            | 91787463                                                             |
| Hsa_hg19_circRNA_end    | Sequence termination position                                                                                                                                                                                                                                                                         | 91810001                                                             |
| Hsa_hg19_circRNA_strand | Sources of positive and negative chain of circRNA sequence                                                                                                                                                                                                                                            | +/-                                                                  |
| genomic_length          | Sequence length on genome                                                                                                                                                                                                                                                                             | 53243                                                                |
| spliced_seq_length      | Sequence length after splicing                                                                                                                                                                                                                                                                        | 2700                                                                 |
| best_transcript         | Best transcript                                                                                                                                                                                                                                                                                       | NM_024913                                                            |
| gene_symbol             | Source parent gene name                                                                                                                                                                                                                                                                               | CCDC88C                                                              |
