# Supplementary material for: Oxidative Stress-Induced circHBEGF Promotes Extracellular Matrix Production via Regulating miR-646/EGFR in Human Trabecular Meshwork Cells
Source: Hindawi journal article supplement (doi:10.1155/2020/4692034), 2020-11-24
Supplement: f4 [file 4692034.f4.pdf]

Column A: Title ;  
 Column B: Mean ;  
 Column C: Example ;

| Title               | Mean                                                                         | Example                                                      |
|---------------------|------------------------------------------------------------------------------|--------------------------------------------------------------|
| Title               | Mean                                                                         | Example                                                      |
| ControlType         | quality control site (pos:Quality Control Point, FALSE: Non-QPos/FALSE       |                                                              |
| Sample_NS           | Normalized signal values of probes in samples                                | 7.023509                                                     |
| Sample_flag         | Detection and determination of samples: A: There is no signifiP/M/A          |                                                              |
| Fold_change(1_vs_2) | (formula : foldchange=average(power(2,signal(CASE)))/ avera3.4               |                                                              |
| foldchange (abs)    | (formula : if foldchange >1, foldchange (abs) = foldchange, fo3.4            |                                                              |
| Regulation(1_vs_2)  | Up-down trend of two groups (Biologically repetitive samples) o up/down      |                                                              |
| Type                | RNAtype: circRNA/lncRNA / mRNA                                               | circRNA/lncRNA/mRNA                                          |
| ProbeSeq            | Probe sequence                                                               | AAGGTATCTTAAGGAAAGTTCAAGGTAAAAAGACAGAGGTGTTTATGGTTACATGTGTGT |
| Accession           | ID of RNA in database                                                        | lnc-ZNF558-1:4                                               |
| Source              | Database Sources of Gene Sequences                                           | ENSEMBL_GENCODE                                              |
| Chr                 | Chromosome Location                                                          | Chr19                                                        |
| strand              | Sequence Positive and Negative Chain Sources                                 | -/+                                                          |
| Start               | Sequence starting position                                                   | 8831143                                                      |
| end                 | Sequence termination position                                                | 8832242                                                      |
| GeneSymbol          | Gene name abbreviation                                                       | SNHG23                                                       |
| gene_description    | Gene Function Description                                                    | translation regulatory long non-coding RNA 1                 |
| EntrezGeneID        | Number of genes on Entrez                                                    | 55357                                                        |
| GO                  | gene ontology: classification of genes according to cellular bioloGO:0043565 |                                                              |
| Relation            | The relationship between lncRNA and adjacent mRNA                            | Intergenic                                                   |
| Associated_gene     | Gene symbols for identified lncRNA associated genes in relation Zfp846       |                                                              |

| Sl. No. | Name of the Candidate | Grade | Remarks           |
|---------|-----------------------|-------|-------------------|
| 1       | Amit Kumar            | B     | Good              |
| 2       | Ananya Singh          | C     | Average           |
| 3       | Arjun Reddy           | A     | Excellent         |
| 4       | Ashika Devi           | D     | Needs Improvement |
| 5       | Ashish Jain           | B+    | Good              |
| 6       | Ashish Kumar          | C     | Average           |
| 7       | Ashish Singh          | A     | Excellent         |
| 8       | Ashish Verma          | D     | Needs Improvement |
| 9       | Ashish Yadav          | B     | Good              |
| 10      | Ashish Yadav          | C     | Average           |
| 11      | Ashish Yadav          | A     | Excellent         |
| 12      | Ashish Yadav          | D     | Needs Improvement |
| 13      | Ashish Yadav          | B     | Good              |
| 14      | Ashish Yadav          | C     | Average           |
| 15      | Ashish Yadav          | A     | Excellent         |
| 16      | Ashish Yadav          | D     | Needs Improvement |
| 17      | Ashish Yadav          | B     | Good              |
| 18      | Ashish Yadav          | C     | Average           |
| 19      | Ashish Yadav          | A     | Excellent         |
| 20      | Ashish Yadav          | D     | Needs Improvement |
| 21      | Ashish Yadav          | B     | Good              |
| 22      | Ashish Yadav          | C     | Average           |
| 23      | Ashish Yadav          | A     | Excellent         |
| 24      | Ashish Yadav          | D     | Needs Improvement |
| 25      | Ashish Yadav          | B     | Good              |
| 26      | Ashish Yadav          | C     | Average           |
| 27      | Ashish Yadav          | A     | Excellent         |
| 28      | Ashish Yadav          | D     | Needs Improvement |
| 29      | Ashish Yadav          | B     | Good              |
| 30      | Ashish Yadav          | C     | Average           |
| 31      | Ashish Yadav          | A     | Excellent         |
| 32      | Ashish Yadav          | D     | Needs Improvement |
| 33      | Ashish Yadav          | B     | Good              |
| 34      | Ashish Yadav          | C     | Average           |
| 35      | Ashish Yadav          | A     | Excellent         |
| 36      | Ashish Yadav          | D     | Needs Improvement |
| 37      | Ashish Yadav          | B     | Good              |
| 38      | Ashish Yadav          | C     | Average           |
| 39      | Ashish Yadav          | A     | Excellent         |
| 40      | Ashish Yadav          | D     | Needs Improvement |
| 41      | Ashish Yadav          | B     | Good              |
| 42      | Ashish Yadav          | C     | Average           |
| 43      | Ashish Yadav          | A     | Excellent         |
| 44      | Ashish Yadav          | D     | Needs Improvement |
| 45      | Ashish Yadav          | B     | Good              |
| 46      | Ashish Yadav          | C     | Average           |
| 47      | Ashish Yadav          | A     | Excellent         |
| 48      | Ashish Yadav          | D     | Needs Improvement |
| 49      | Ashish Yadav          | B     | Good              |
| 50      | Ashish Yadav          | C     | Average           |
| 51      | Ashish Yadav          | A     | Excellent         |
| 52      | Ashish Yadav          | D     | Needs Improvement |
| 53      | Ashish Yadav          | B     | Good              |
| 54      | Ashish Yadav          | C     | Average           |
| 55      | Ashish Yadav          | A     | Excellent         |
| 56      | Ashish Yadav          | D     | Needs Improvement |
| 57      | Ashish Yadav          | B     | Good              |
| 58      | Ashish Yadav          | C     | Average           |
| 59      | Ashish Yadav          | A     | Excellent         |
| 60      | Ashish Yadav          | D     | Needs Improvement |
| 61      | Ashish Yadav          | B     | Good              |
| 62      | Ashish Yadav          | C     | Average           |
| 63      | Ashish Yadav          | A     | Excellent         |
| 64      | Ashish Yadav          | D     | Needs Improvement |
| 65      | Ashish Yadav          | B     | Good              |
| 66      | Ashish Yadav          | C     | Average           |
| 67      | Ashish Yadav          | A     | Excellent         |
| 68      | Ashish Yadav          | D     | Needs Improvement |
| 69      | Ashish Yadav          | B     | Good              |
| 70      | Ashish Yadav          | C     | Average           |
| 71      | Ashish Yadav          | A     | Excellent         |
| 72      | Ashish Yadav          | D     | Needs Improvement |
| 73      | Ashish Yadav          | B     | Good              |
| 74      | Ashish Yadav          | C     | Average           |
| 75      | Ashish Yadav          | A     | Excellent         |
| 76      | Ashish Yadav          | D     | Needs Improvement |
| 77      | Ashish Yadav          | B     | Good              |
| 78      | Ashish Yadav          | C     | Average           |
| 79      | Ashish Yadav          | A     | Excellent         |
| 80      | Ashish Yadav          | D     | Needs Improvement |
| 81      | Ashish Yadav          | B     | Good              |
| 82      | Ashish Yadav          | C     | Average           |
| 83      | Ashish Yadav          | A     | Excellent         |
| 84      | Ashish Yadav          | D     | Needs Improvement |
| 85      | Ashish Yadav          | B     | Good              |
| 86      | Ashish Yadav          | C     | Average           |
| 87      | Ashish Yadav          | A     | Excellent         |
| 88      | Ashish Yadav          | D     | Needs Improvement |
| 89      | Ashish Yadav          | B     | Good              |
| 90      | Ashish Yadav          | C     | Average           |
| 91      | Ashish Yadav          | A     | Excellent         |
| 92      | Ashish Yadav          | D     | Needs Improvement |
| 93      | Ashish Yadav          | B     | Good              |
| 94      | Ashish Yadav          | C     | Average           |
| 95      | Ashish Yadav          | A     | Excellent         |
| 96      | Ashish Yadav          | D     | Needs Improvement |
| 97      | Ashish Yadav          | B     | Good              |
| 98      | Ashish Yadav          | C     | Average           |
| 99      | Ashish Yadav          | A     | Excellent         |
| 100     | Ashish Yadav          | D     | Needs Improvement |
