# Supplementary material for: Oxidative Stress-Induced circHBEGF Promotes Extracellular Matrix Production via Regulating miR-646/EGFR in Human Trabecular Meshwork Cells
Source: Hindawi journal article supplement (doi:10.1155/2020/4692034), 2020-11-24
Supplement: f5 [file 4692034.f5.pdf]

*Table S3. The sequences of the RT-PCR primers (5' - 3')*

|                       |                                                        |
|-----------------------|--------------------------------------------------------|
| hsa_circ_0080940-F    | CTGTAGGAACAGGCATAGGAGAT                                |
| hsa_circ_0080940-R    | AGCCAAGATGATGCAGCGTTC                                  |
| hsa_circ_0080942-F    | GACTCCTCCCAGGCAATTTCT                                  |
| hsa_circ_0080942-R    | CTCAACATAGGTTCTAAGGATCCTC                              |
| hsa_circ_0074241-F    | AAGTCACGGACTTTCCGGTC                                   |
| hsa_circ_0074241-R    | AGAGGCAGATCTGGACCTTTTG                                 |
| hsa_circ_0009510-F    | AGGTAGCTGTCGCAAGGCA                                    |
| hsa_circ_0009510-R    | CAGGGAACGTCTGGGAGAAC                                   |
| hsa_circ_0050104-F    | AGGAGCATCTGAGAGCCATTC                                  |
| hsa_circ_0050104-R    | CAGTTGTCCTGCCCTGTGGA                                   |
| hsa_circ_0006895-F    | CCTGCACCCACTCTTACTCA                                   |
| hsa_circ_0006895-R    | TGAGGAGGTCTGACTTGCTGA                                  |
| hsa_circ_0080943-F    | ACTGAGACCAGGTTGAGCTG                                   |
| hsa_circ_0080943-R    | AACAGCCTCCTTCACAAGGC                                   |
| hsa_circ_0047835-F    | TTGATGAAACGTGCACCTCCTG                                 |
| hsa_circ_0047835-R    | CAGCCTAGAGGCAGCTATTTTACC                               |
| hsa_circ_0074150-F    | TCATGACTAAGGCCATTCCAGC                                 |
| hsa_circ_0074150-R    | CCTCATCTGTGCAGACTGACATC                                |
| hsa_circ_0031462-F    | CACCATGCCGTAACAGAGTCTT                                 |
| hsa_circ_0031462-R    | TGGTCTATAGAGCATGTGGAGC                                 |
| hsa_circ_0050202-F    | AGCTGGTGTGCAGGAGGAA                                    |
| hsa_circ_0050202-R    | CAAAGCCCATTGCACGGGA                                    |
| miR-4664-3p stem loop | GTCGTATCCAGTGCAGGGTCCGAGGTATTCGCACTG<br>GATACGACCTGCCC |
| miR-4664-3p-F         | GGTCCGAAGGCCAGACACTCG                                  |
| miR-4687-5p stem loop | GTCGTATCCAGTGCAGGGTCCGAGGTATTCGCACTG<br>GATACGACAAACCC |
| miR-4687-5p-F         | GGTCCGTCGGGAGGAGGGCGT                                  |
| miR-149-5p stem loop  | GTCGTATCCAGTGCAGGGTCCGAGGTATTCGCACTG<br>GATACGACCCCTCA |
| miR-149-5p-F          | GGTCCAGACCGAGGCACAGAAG                                 |
| miR-6131 stem loop    | GTCGTATCCAGTGCAGGGTCCGAGGTATTCGCACTG<br>GATACGACGTGAGG |
| miR-6131-F            | GGTCCCCGACCAGTCTAC                                     |
| miR-646 stem loop     | GTCGTATCCAGTGCAGGGTCCGAGGTATTCGCACTG                   |
| miR-646-F             | GGTCCTTCGTCGACGGAG                                     |
| Universal reverse     | GTGCAGGGTCCGAGGT                                       |
| U6 stem loop          | GTCGTATCCAGTGCAGGGTCCGAGGTATTCGCACTG<br>GATACGACAAAATA |
| U6-F                  | CTCGCTTCGGCAGCACA                                      |

|               |                         |
|---------------|-------------------------|
| U6-R          | AACGCTTCACGAATTTGCGT    |
| Fibronectin-F | GAGAATAAGCTGTACCATCGCAA |
| Fibronectin-R | CGACCACATAGGAAGTCCCAG   |
| Collagen I -F | ATCAACCGGAGGAATTTCCGT   |
| Collagen I -R | CACCAGGACGACCAGGTTTTC   |
| NOB1-F        | CAGGACATCGGGAAGAACATTT  |
| NOB1-R        | CCGCACGTATTCCGGTAAGG    |
| FGF2-F        | AGAAGAGCGACCCTCACATCA   |
| FGF2-R        | CGGTTAGCACACACTCCTTTG   |
| EGFR-F        | AGGCACGAGTAACAAGCTCAC   |
| EGFR-R        | ATGAGGACATAACCAGCCACC   |
| FOXK1-F       | CATTACCCCTACTACCGGACG   |
| FOXK1-R       | GTAACGGTTCAAAGAGAGGTTGT |
| NPM1-F        | GCACTTAGTAGCTGTGGAGGA   |
| NPM1-R        | TTCACTGGCGCTTTTTCTTCA   |
| MIP-F         | ATACCTGGGCTATGACTGGATT  |
| MIP-R         | AGTACACGCATTCATGGTCTTC  |
| IGF1-F        | GCTCTTCAGTTCGTGTGTGGA   |
| IGF1-R        | GCCTCCTTAGATCACAGCTCC   |
| CDK6-F        | CCAGATGGCTCTAACCTCAGT   |
| CDK6-R        | AACTTCCACGAAAAAGAGGCTT  |
